# Supplementary material for: pTrimmer: An efficient tool to trim primers of multiplex deep sequencing data
Source: PubMed Central journal article supplement (PMC6511130; doi:10.1186/s12859-019-2854-x), 2019-05-10
Supplement: 12859_2019_2854_MOESM2_ESM.pdf [file 12859_2019_2854_MOESM2_ESM.pdf]

```

1: kmer_length = 8
2: max_mismatch = 3 // maximum allowed mismatched base-pair
3: N = max_primer_length + 6
4: S = read_seq[0:N]
5: Hash = {all kmers} // A hash table contains all kmer sequence of primers
6:
7: /* start to perform 'k-mers model' */
8: i = 0
9: while i < 12 do
10:   key = S[i: i+kmer_length]
11:   primer = Hash[key]
12:   mis_num = Mismatch_Check(primer, S)
13:   if mis_num < max_mismatch then
14:     return primer
15:   end if
16:   i = i + 1
17: end while
18:
19: /* if 'k-mers model' fails, start to perform 'dynamic model' */
20: K_Num = N - kmer_length // k-mer number of sequence S
21: K = {kj; j = 1..K_Num} // all potential kmer sequence of S
22: Hit = {NULL} // record hit number for each candidate primer
23:
24: j = 0
25: while j < K_Num do
26:   primer = Hash[Kj]
27:   Hit[primer] = Hit[primer] + 1
28:   j = j + 1
29: end while
30:
31: target_primer = Max_Hit_Primer(Hit) // get primer that has highest kmer hit
32: mis_num = Dynamic_Check(target_primer, S) // Needleman-Wunsch local alignment
33: if mis_num < max_mismatch then
34:   return target_primer
35: end if

```
